# Supplementary material for: Selenenylsulfide covalent-directed chemistry for the detection of sulfhydryl groups using a diselenide fluorescent probe
Source: Royal Society of Chemistry journal article supplement (doi:10.1039/d4ra05923a), 2024-01-01
Supplement: d4ra05923a1.pdf [file d4ra05923a1.pdf]

# Supplementary Information

## **Selenenylsulfide covalent-directed chemistry for the detection of sulfhydryl groups using a diselenide fluorescent probe**

*Chunqiu Ma, Jichao Xu, Xiaolu Wang, Xuewen Wang, Lei Zhang, Su Jing\**

*School of Chemistry and Molecular Engineering, Nanjing Tech University, Nanjing 211816, China.*

*\*Corresponding author. Email: [sjing@njtech.edu.cn](mailto:sjing@njtech.edu.cn).*

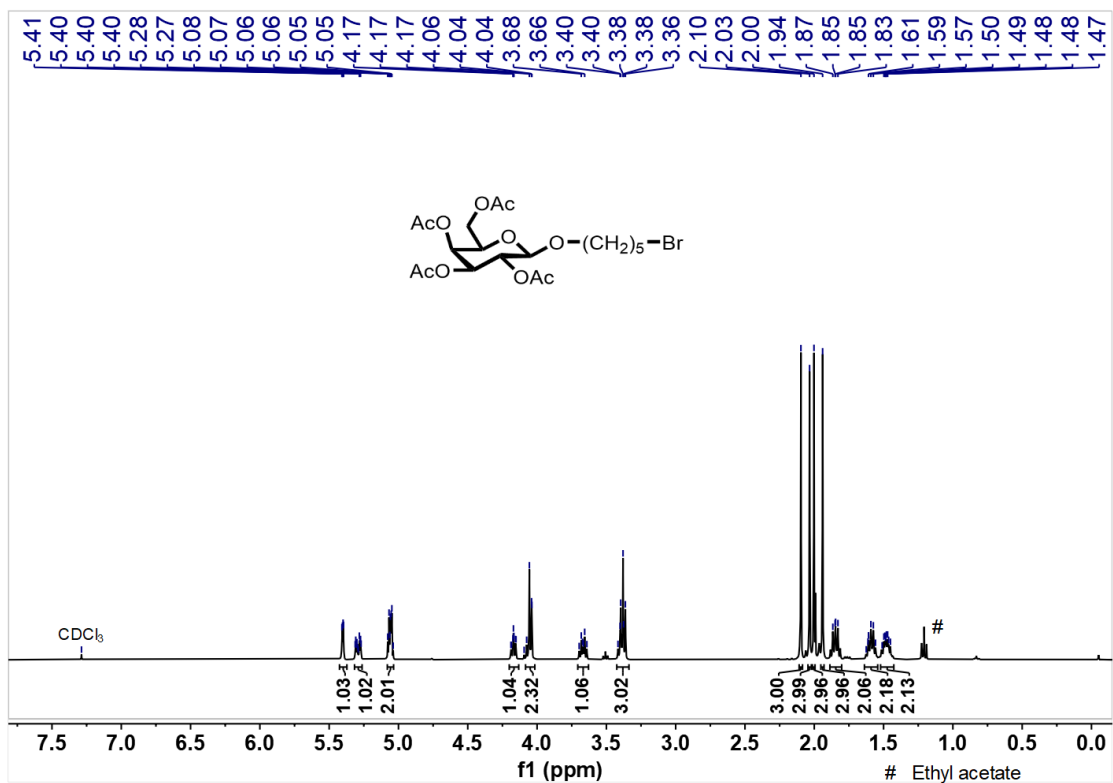

Fig. S1. <sup>1</sup>H NMR spectrum of compound 2.

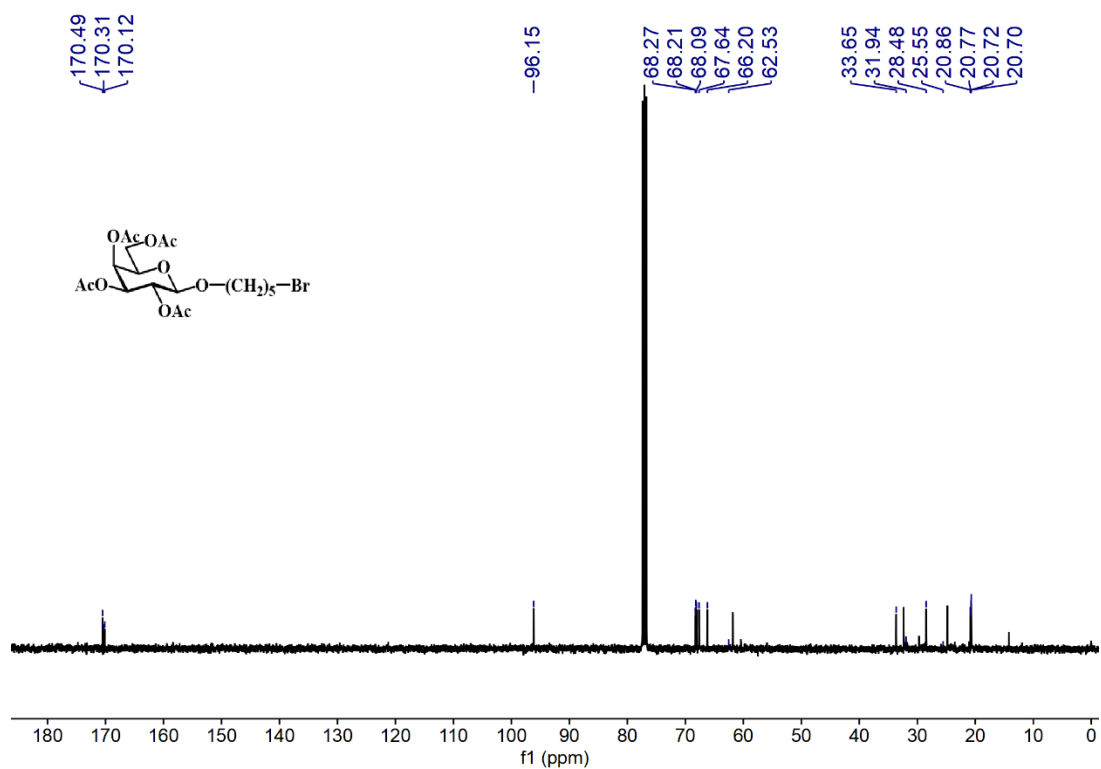

Fig. S2. <sup>13</sup>C NMR and spectrum of compound 2.

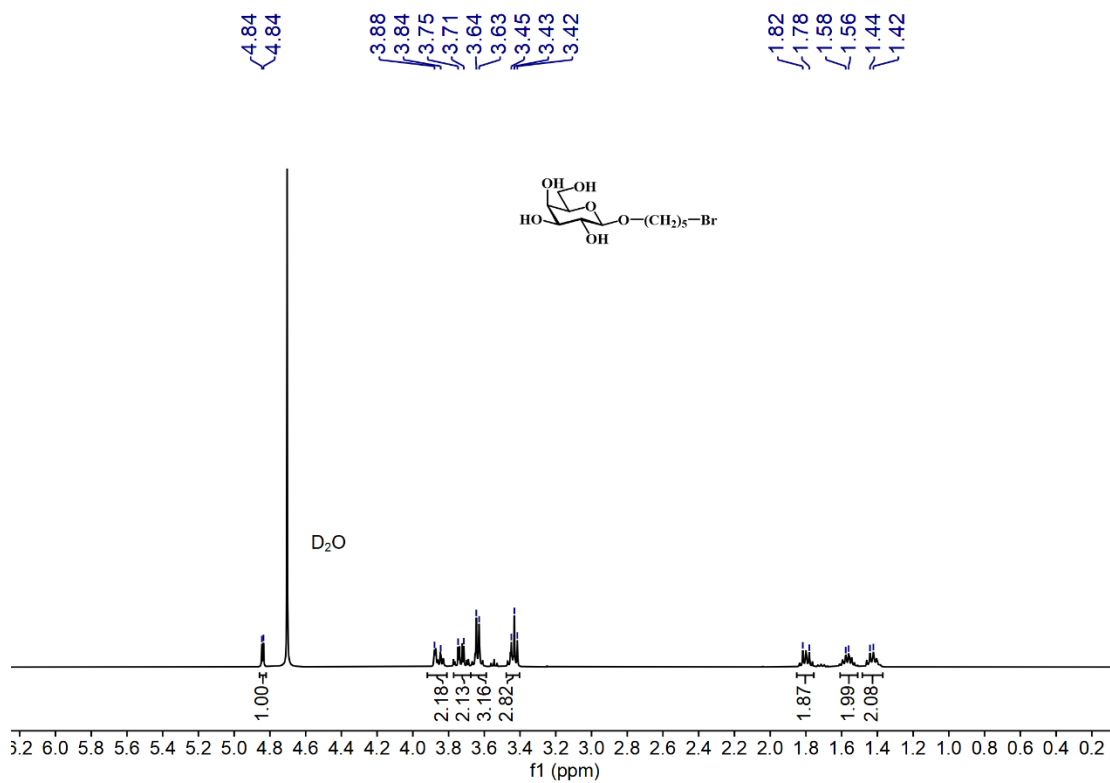

**Fig. S3.**  $^1\text{H NMR}$  spectrum of compound 3.

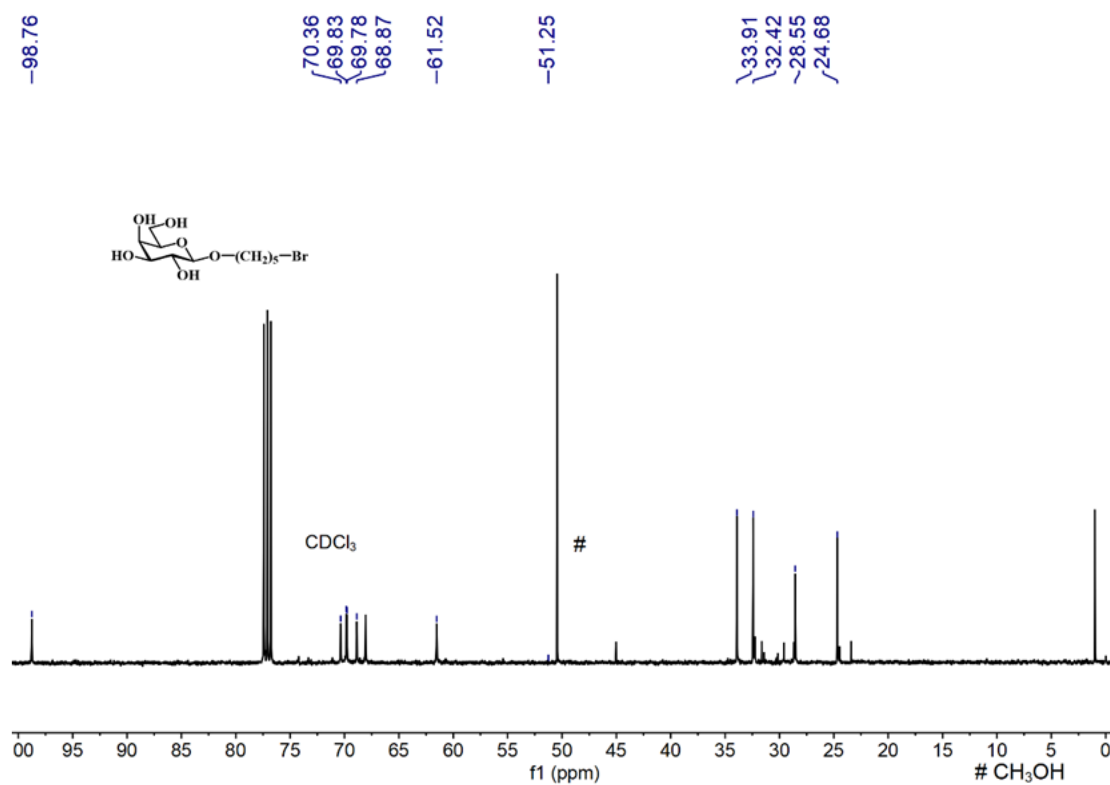

**Fig. S4.**  $^{13}\text{C NMR}$  and spectrum of compound 3.

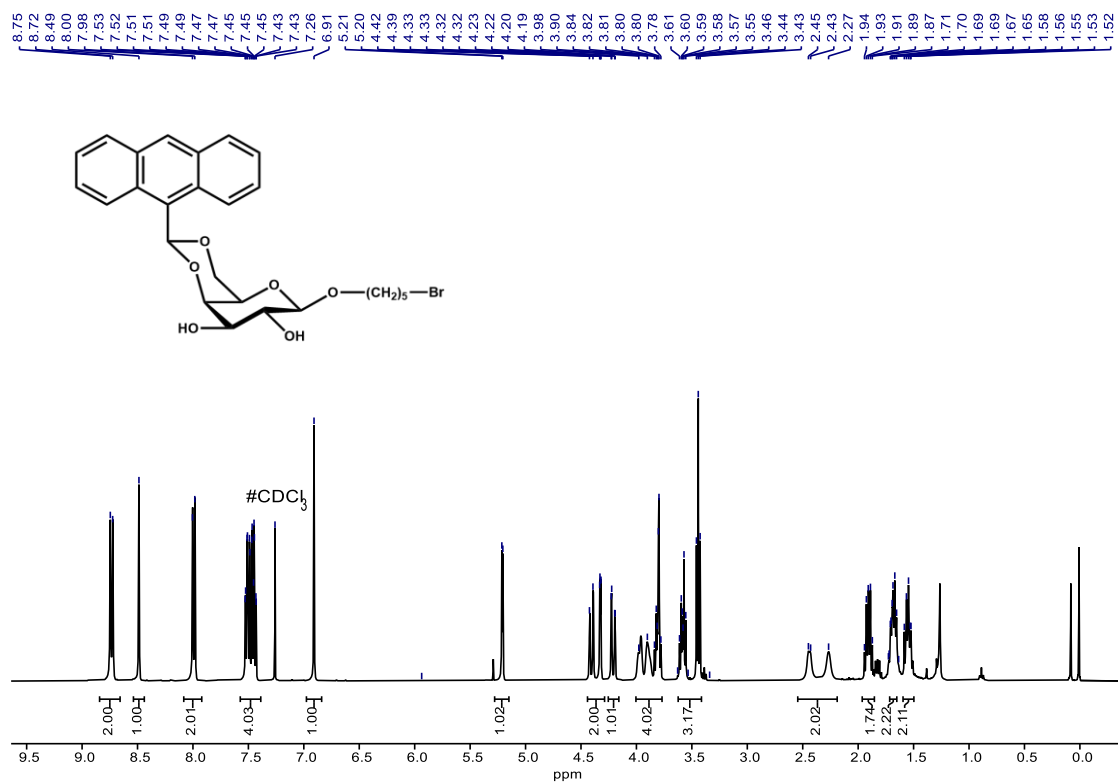

Fig. S5. <sup>1</sup>H NMR spectrum of compound 4.

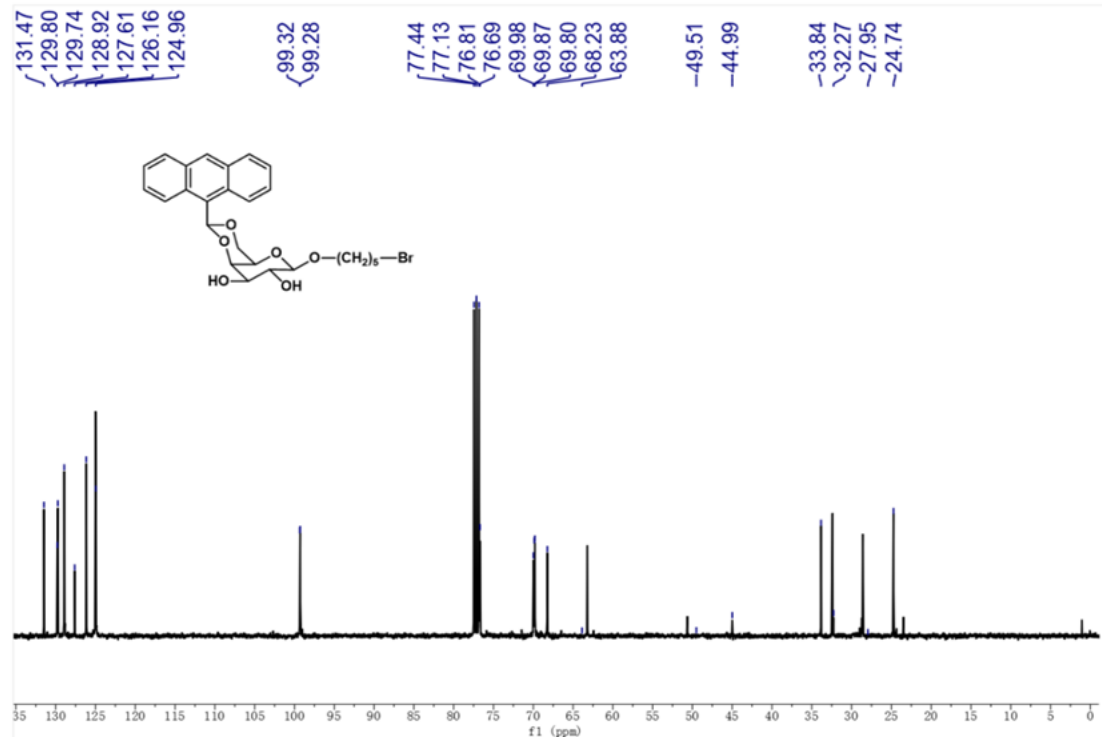

Fig. S6. <sup>13</sup>C NMR and spectrum of compound 4.

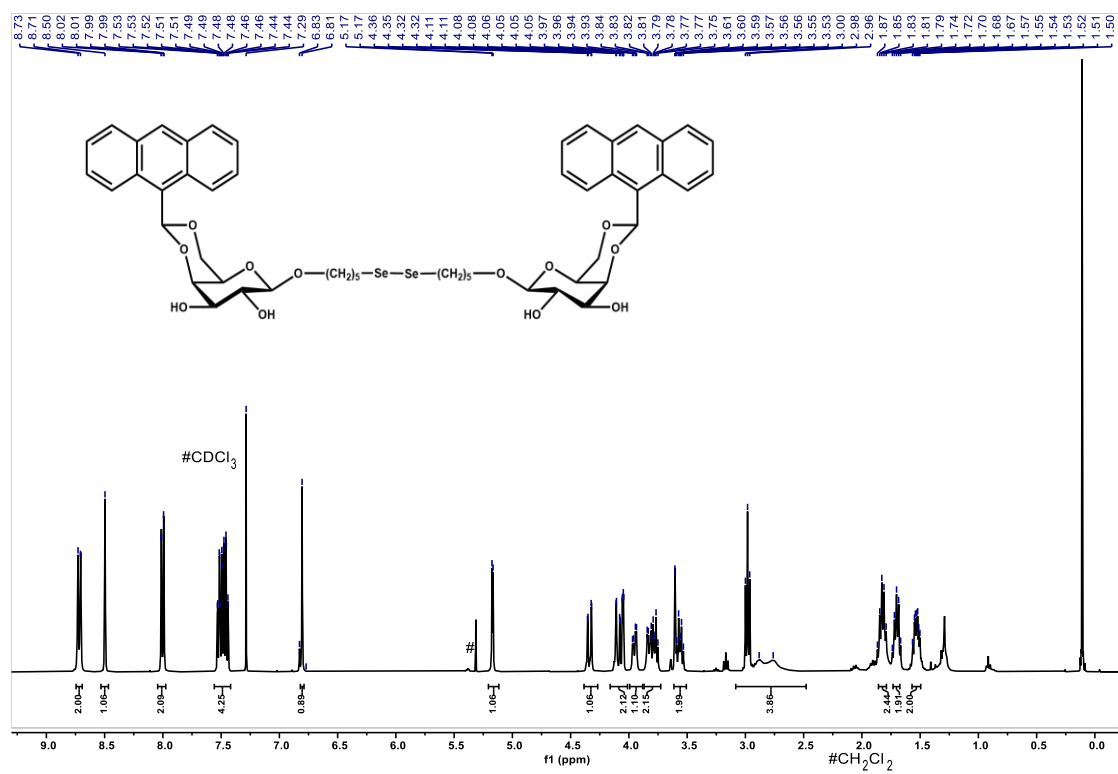

Fig. S7. <sup>1</sup>H NMR spectrum of compound 5.

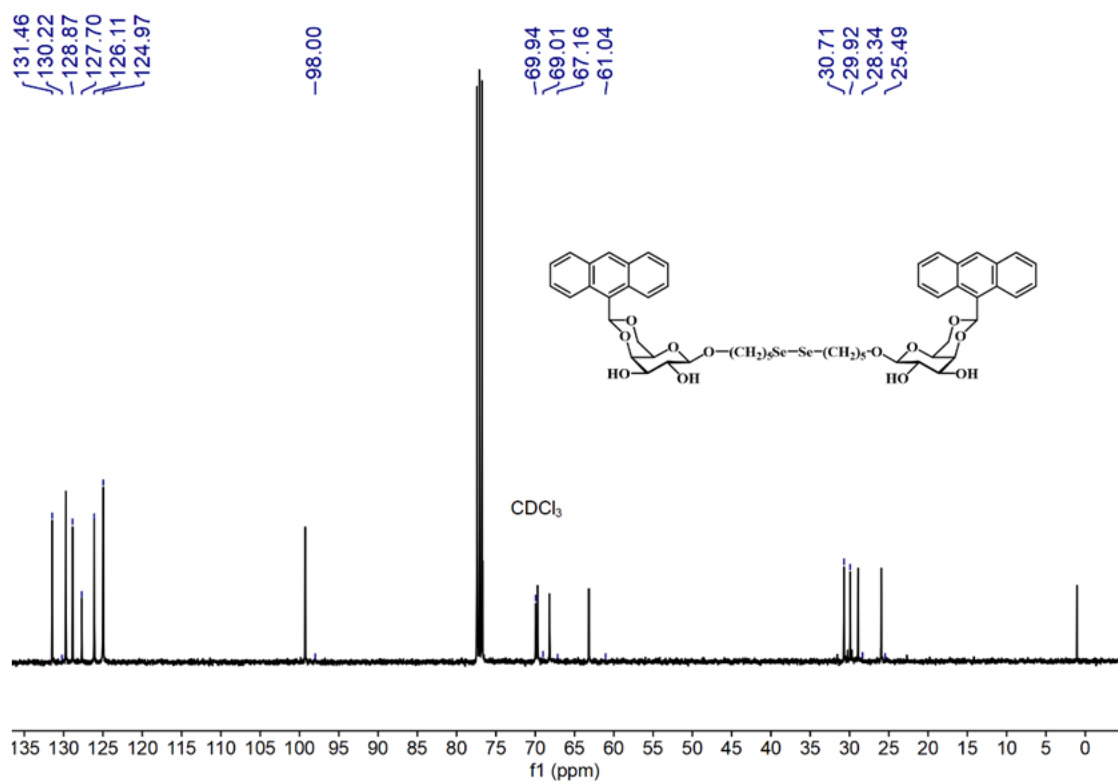

Fig. S8. <sup>13</sup>C NMR spectrum of compound 5.

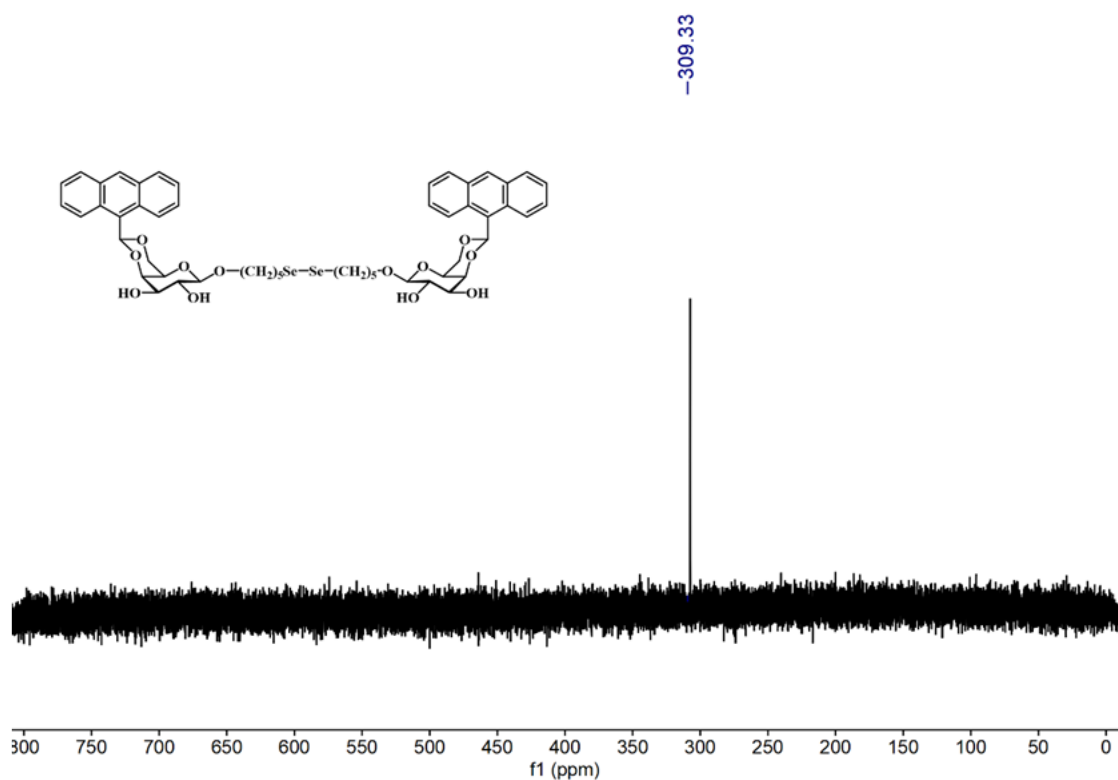

**Fig. S9.**  $^{77}\text{Se}$  NMR spectrum of compound **5**.

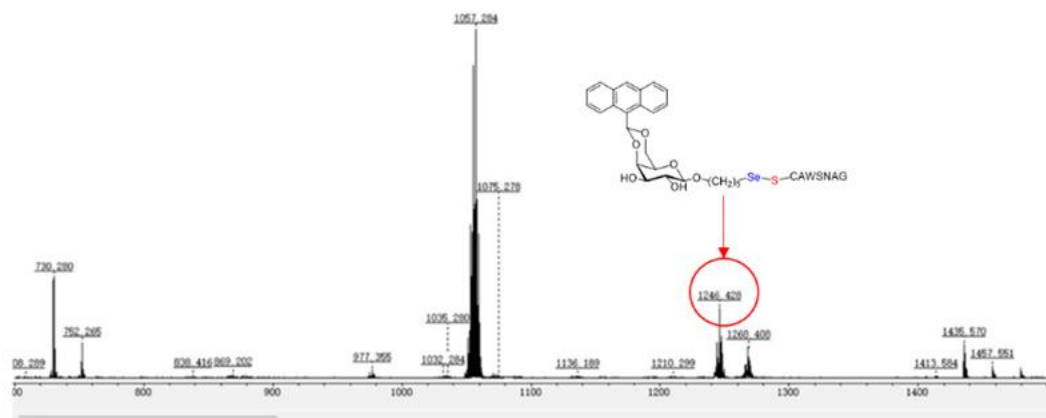

**Fig. S10.** MALDI-TOF-MS mass spectrum of compound **5** + peptide (CAWSNAG).

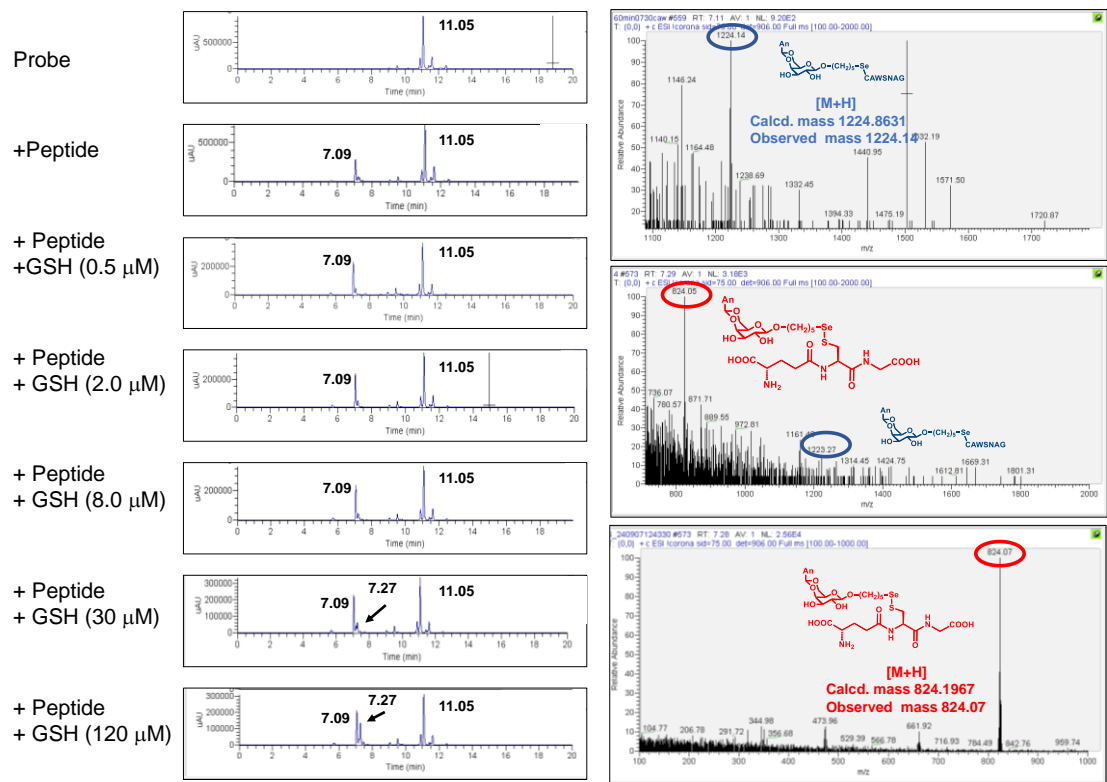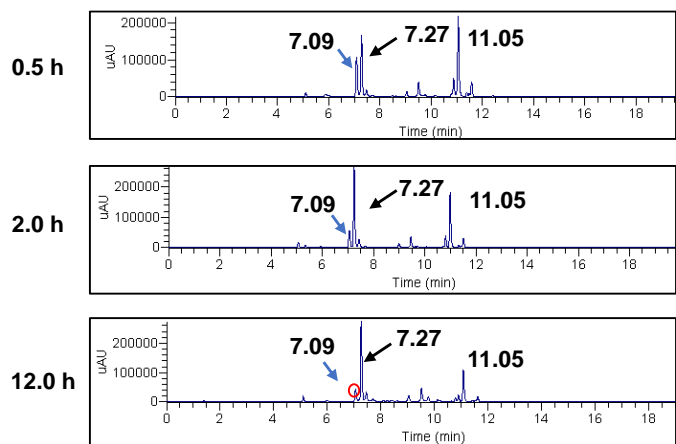

**Fig. S12.** LC-MS analysis of the probe-peptide conjugate in the presence of reduced glutathione (1.0 mM) after different times.

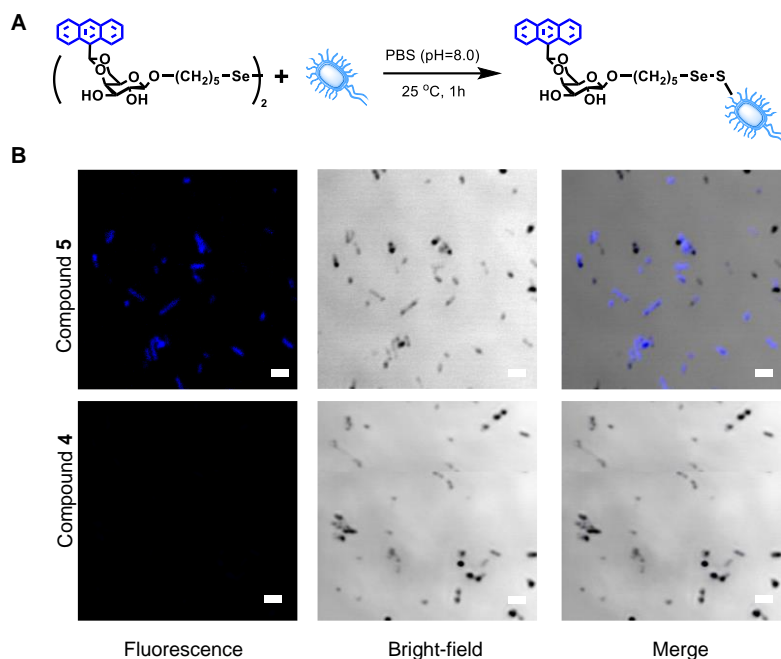

**Fig. S13.** (A) Schematic diagram of the reaction routine for labelling *E. coli* with the probe **5**. (B) Fluorescence confocal images of *E. coli* labelled with probe **5**. Scale bar, 5  $\mu\text{m}$ .

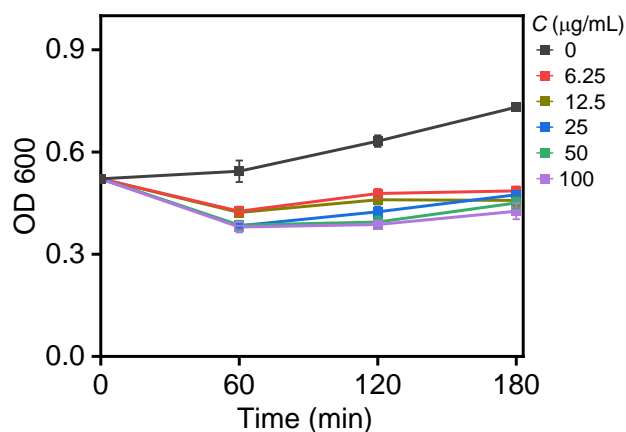

**Fig. S14.** Effects of varying concentrations of compound **5** on the growth of *E. coli*.

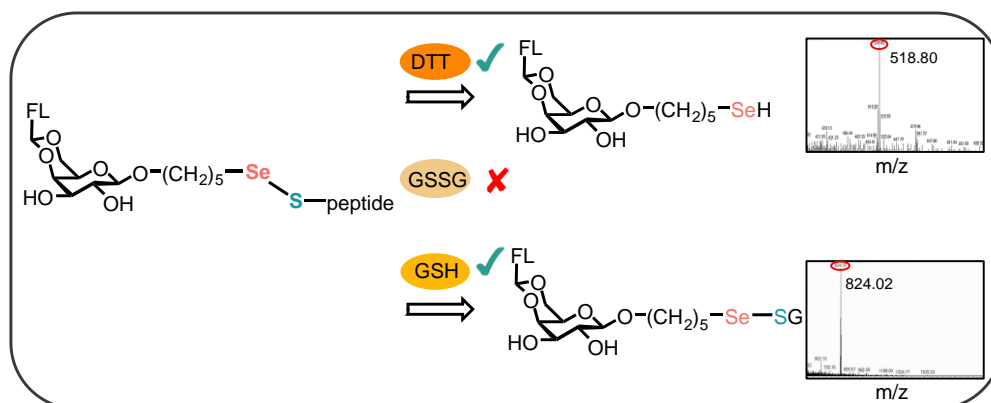

**Fig. S15.** The effect of reducing sulfhydryl-containing compounds, GSH and DTT, on the conjugation of probe-peptide via Se-S covalent chemistry.
